# Supplementary material for: From fine to giant: Multi-instrument assessment of the dust particle size distribution at an emission source during the J-WADI field campaign
Source: Copernicus journal article supplement (doi:10.5194/egusphere-2025-1531), 2025-05-08
Supplement: Supplementary file [file egusphere-2025-1531-AC2-supplement.pdf]

## Response to Reviewer #2

We thank the reviewer for their positive assessment of our study and for highlighting the value of our dataset and experimental design. We acknowledge that the process of combining the PSDs from the different instruments was not sufficiently explained in the original manuscript.

Below, we provide a response. Reviewer comments are italicized, followed by our responses.

---

*The only thing I found odd is that I couldn't tell how the authors combined the PSDs for multiple instruments into the final PSD presented in figure 11. A couple of lines at the start of section 3.5 would probably be sufficient.*

We have now included a link to the appendix where it is explained how the final PSD presented in Fig. 11 from SANTRI2, Welas, and Fidas were combined, including how overlapping size ranges and measurement gaps were handled.
